# Supplementary material for: Functional Analysis of Odorant-Binding Proteins 12 and 17 from Wheat Blossom Midge Sitodiplosis mosellana Géhin (Diptera: Cecidomyiidae)
Source: MDPI journal article supplement (doi:10.3390/insects11120891), 2020-12-17
Supplement: s1 [file s1]

### SmosOBP12

```

1  ATGCTAAAAGATTTAATTTTAGTCGCTGGTATTATTTTCACCGCTGTTACAGCCGTTGAAATACGTCGAGATGATCAGTGGCCACCACCCGAAGTCGTTGCTATTGTTTACGCCAATGAGA
1  M L K D L I L V A G I I F T A V T A V E I R R D D Q W P P P E V V A I V Q P M R
121 ATTGTGTGCCAAGAAAAAACTGGCGTCACCGACGAGGCGATCCGAGAATTTAGTGATGGTGAAATTCATGAAGACGAAGCGTTGAAATGCTACATGGATTGTCTATTTAAAGAAGCTCGG
41  I V C Q E K T G V T D E A I R E F S D G E I H E D E A L K C Y M D C L F K E A R
241 GTTGTGGATGAAAATGGTGAATTACATTTGAAAAAATTGCCACACACATCGAAAAATTGGACGAGGAAATTCAAATGATCGCCATTGCGATGGGCAAGAAGTGCTTACGAGTAAAAGGG
81  V V D E N G E L H L E K L A T H I E K L D E E I Q M I A I R M G K K C L R V K G
361 GAAAATCAGTGTGAACGAGCTTTTGGTATCATAAATGCTGGAAAAACAGCCGATCCAAAACATTACTTCTTGCTTTAA
121 E N Q C E R A F W Y H K C W K T A D P K H Y F L L *

```

### SmosOBP17

```

1  ATGAACGGAATGAAAGGTTTACTGATTTTTCAGTGCCTTTGAACTGCTTCAATGGCATCTATTCAAGTTTATCTGTTGAAGAGCTAACGCAAATGATGACGTCTTTTCGAGTGCAATGT
1  M N G M K G L L I F A V L L N C F N G I Y S S L S V E E L T Q M M T S F R V Q C
121 CAAGCCCAAACCGGAGCTTCTGATGATCTTATTGATGGAATTAATGTGGGCCAATTTCGAAGAGACCAAAATTTAATGTGCTACATAAATGTTTACTTACAATGATGCGAATGATAAGG
41  Q A Q T G A S D D L I D G I N V G Q F P R D Q N L M C Y I N C L L T M M R M I R
241 AAGGGAAAATTCAATTCTGAATTGGCAGTTAAGAATATAAATATGTTCTTGCCTGAATTTATGCGCGAAGAATGGTTGAGGGGAGTTGCAGCATGCAAAGATCATGGAGAAGATATTGTC
81  K G K F N S E L A V K N I N M F L P E F M R E E W L R G V A A C K D H G E D I V
361 GATCAATGCGAAAGGATATATTCAAAGATTGAATGTTTCTCCAGAAATAACGAACATTTTCATATTCCA TAG
121 D Q C E R I Y S K I E C F S R N N E H F I F P *

```

**Figure S1.** Nucleotide and deduced amino acid sequences of *SmosOBP12* and *SmosOBP17* in *Sitodiplosis mosellana*. Start and stop codons are boxed. Predicated signal peptides are underlined. The six conserved cysteines are circled.
